# Supplementary material for: Mitigating substrate effects of van der Waals semiconductors using perfluoropolyether self-assembled monolayers
Source: Royal Society of Chemistry journal article supplement (doi:10.1039/d4nr00061g), 2024-01-01
Supplement: d4nr00061g1.pdf [file d4nr00061g1.pdf]

## Supporting Information

### The surface energy modulation of van der Waals interface in atomically thin semiconductor

*Dae Young Park<sup>1,#</sup>, Hyeong Chan Suh<sup>1,#</sup>, Seungho Bang<sup>1</sup>, Juchan Lee<sup>1</sup>, Jaekak Yoo<sup>2,3</sup>, Hayoung Ko<sup>2</sup>, Soo Ho Choi<sup>2</sup>, Ki Kang Kim<sup>2</sup>, Seung Mi Lee<sup>3</sup>, Seong Chu Lim<sup>2</sup>, Tschang-Uh Nahm<sup>1</sup>, and Mun Seok Jeong<sup>1,\*</sup>*

<sup>1</sup>Department of Physics, Hanyang University, Seoul 04763, Republic of Korea

<sup>2</sup>Department of Energy Science, Sungkyunkwan University, Suwon 16419, Republic of Korea

<sup>3</sup>Korea Research Institute of Standards and Science, Daejeon 34113, Republic of Korea

\* Address correspondence to [mjeong@hanyang.ac.kr](mailto:mjeong@hanyang.ac.kr) (M.S.J.)

This supporting information includes:

**Figure S1.** The morphology of a) MoSe<sub>2</sub>, b) WS<sub>2</sub>, and c) WSe<sub>2</sub> on S10 (top) and SiO<sub>2</sub> (bottom) surfaces.

**Figure S2.** The XPS spectra of the 1s orbital of Carbon, Fluorine, and Oxygen for a) SiO<sub>2</sub> and b) S10, respectively.

**Figure S3.** Ultraviolet photoelectron spectroscopy of TMDCs on SiO<sub>2</sub> and S10, respectively.

**Figure S4.** The atomic charge distribution of TMDCs/S10 heterostructure through Mulliken analysis.

**Figure S5.** The electrical transport of pristine MoS<sub>2</sub> devices.

**Figure S6.** The electrical transport of pristine MoS<sub>2</sub>/S10 devices.

**Figure S7.** The comparison of electrical properties for the devices of TMDCs monolayer on S10 and SiO<sub>2</sub>, respectively.

**Table S1.** Electronegativity, bonding character, and dipole moment of TMDCs.

**Table S2.** Binding energy of transition metal and chalcogenide in TMDCs on the SiO<sub>2</sub> and S10.

**Table S3.** The changes of dipole moment depending on S10.

**Table S4.** The comparison of field effect mobility and subthreshold swing in TMDCs monolayer on SiO<sub>2</sub> and S10.

**Supporting Note 1**

**Supporting Note 2**

**Supporting Note 3**

**References**

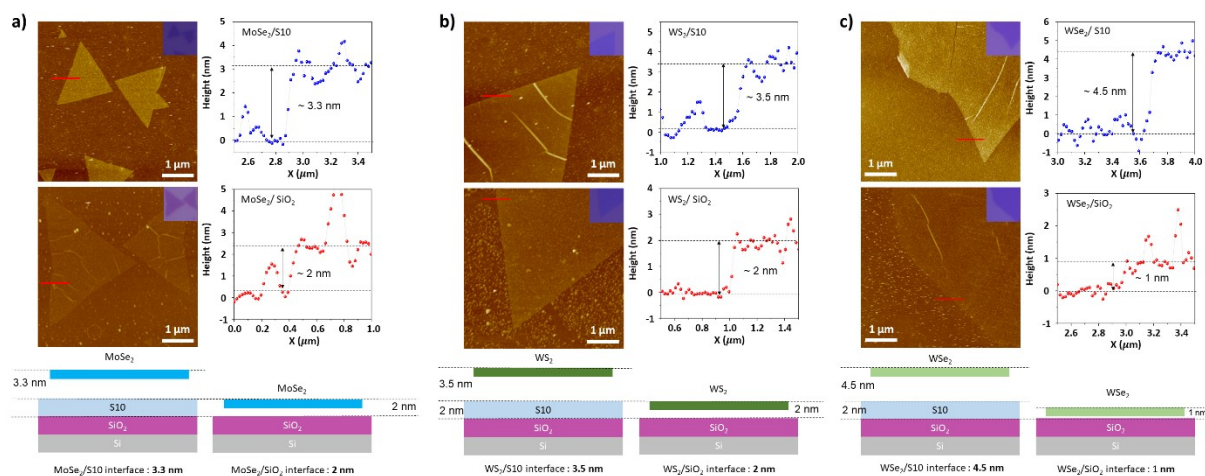

**Figure S1.** The morphology of a) MoSe<sub>2</sub>, b) WS<sub>2</sub>, and c) WSe<sub>2</sub> on S10 (top) and SiO<sub>2</sub> (bottom) surfaces.

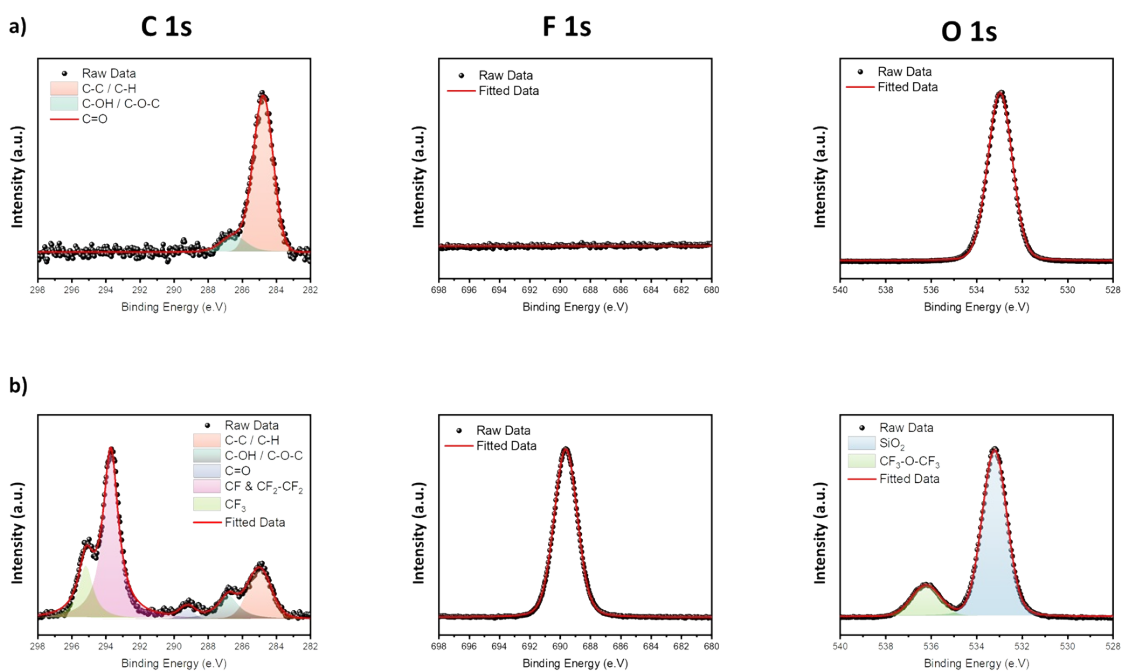

**Figure S2.** The XPS spectra of the 1s orbital of Carbon, Fluorine, and Oxygen for a) SiO<sub>2</sub> and b) S10, respectively.

**Table S1.** Electronegativity, bonding character, and dipole moment of TMDCs.

| <b>Atom</b> | <b>Electronegativity<br/>(<math>\chi</math>)</b> | <b>TMDCs</b>      | <b>Ionic<br/>bonding<br/>(%)</b> | <b>Covalent<br/>bonding<br/>(%)</b> | <b>Bond<br/>length<br/>(Å)</b> | <b>Dipole<br/>moment<br/>(Debye)</b> |
|-------------|--------------------------------------------------|-------------------|----------------------------------|-------------------------------------|--------------------------------|--------------------------------------|
| <b>Mo</b>   | 2.16                                             | MoS <sub>2</sub>  | 4.31                             | 95.69                               | 2.42                           | 0.50                                 |
| <b>W</b>    | 2.36                                             | MoSe <sub>2</sub> | 3.73                             | 96.27                               | 2.49                           | 0.45                                 |
| <b>S</b>    | 2.58                                             | WS <sub>2</sub>   | 1.20                             | 98.80                               | 2.40                           | 0.14                                 |
| <b>Se</b>   | 2.55                                             | WSe <sub>2</sub>  | 0.90                             | 99.10                               | 2.49                           | 0.11                                 |

**Table S2.** Binding energy of transition metal and chalcogenide in TMDCs on the SiO<sub>2</sub> and S10.

| <b>MoS<sub>2</sub></b> |                            |                      |                     |                     |  |
|------------------------|----------------------------|----------------------|---------------------|---------------------|--|
| <b>Substrate</b>       | <b>Binding Energy (eV)</b> |                      |                     |                     |  |
|                        | Mo 3d <sub>5/2</sub>       | Mo 3d <sub>3/2</sub> | S 2p <sub>3/2</sub> | S 2p <sub>1/2</sub> |  |
| <b>SiO<sub>2</sub></b> | 229.58                     | 232.73               | 162.38              | 163.56              |  |
| <b>S10</b>             | 230.03                     | 233.17               | 162.84              | 164.01              |  |
| <b>Shift</b>           | 0.45                       | 0.44                 | 0.46                | 0.45                |  |

  

| <b>WS<sub>2</sub></b>  |                            |                     |                     |                     |                     |
|------------------------|----------------------------|---------------------|---------------------|---------------------|---------------------|
| <b>Substrate</b>       | <b>Binding Energy (eV)</b> |                     |                     |                     |                     |
|                        | W 4f <sub>7/2</sub>        | W 4f <sub>5/2</sub> | W 5p <sub>3/2</sub> | S 2p <sub>3/2</sub> | S 2p <sub>1/2</sub> |
| <b>SiO<sub>2</sub></b> | 33.43                      | 35.59               | 38.95               | 163.11              | 164.31              |
| <b>S10</b>             | 32.74                      | 34.74               | 37.48               | 162.22              | 163.41              |
| <b>Shift</b>           | -0.69                      | -0.85               | -1.47               | -0.89               | -0.9                |

  

| <b>MoSe<sub>2</sub></b> |                            |                      |                      |                      |  |
|-------------------------|----------------------------|----------------------|----------------------|----------------------|--|
| <b>Substrate</b>        | <b>Binding Energy (eV)</b> |                      |                      |                      |  |
|                         | Mo 3d <sub>5/2</sub>       | Mo 3d <sub>3/2</sub> | Se 3d <sub>5/2</sub> | Se 3d <sub>3/2</sub> |  |
| <b>SiO<sub>2</sub></b>  | 229.03                     | 232.18               | 54.43                | 55.3                 |  |
| <b>S10</b>              | 229.11                     | 232.23               | 54.53                | 55.37                |  |
| <b>Shift</b>            | 0.08                       | 0.05                 | 0.1                  | 0.07                 |  |

  

| <b>WSe<sub>2</sub></b> |                            |                     |                     |                      |                      |
|------------------------|----------------------------|---------------------|---------------------|----------------------|----------------------|
| <b>Substrate</b>       | <b>Binding Energy (eV)</b> |                     |                     |                      |                      |
|                        | W 4f <sub>7/2</sub>        | W 4f <sub>5/2</sub> | W 5p <sub>3/2</sub> | Se 3d <sub>5/2</sub> | Se 3d <sub>3/2</sub> |
| <b>SiO<sub>2</sub></b> | 32.58                      | 34.75               | 38.05               | 54.85                | 55.68                |
| <b>S10</b>             | 32.02                      | 34.19               | 37.66               | 54.28                | 55.12                |
| <b>Shift</b>           | -0.56                      | -0.56               | -0.39               | -0.57                | -0.56                |

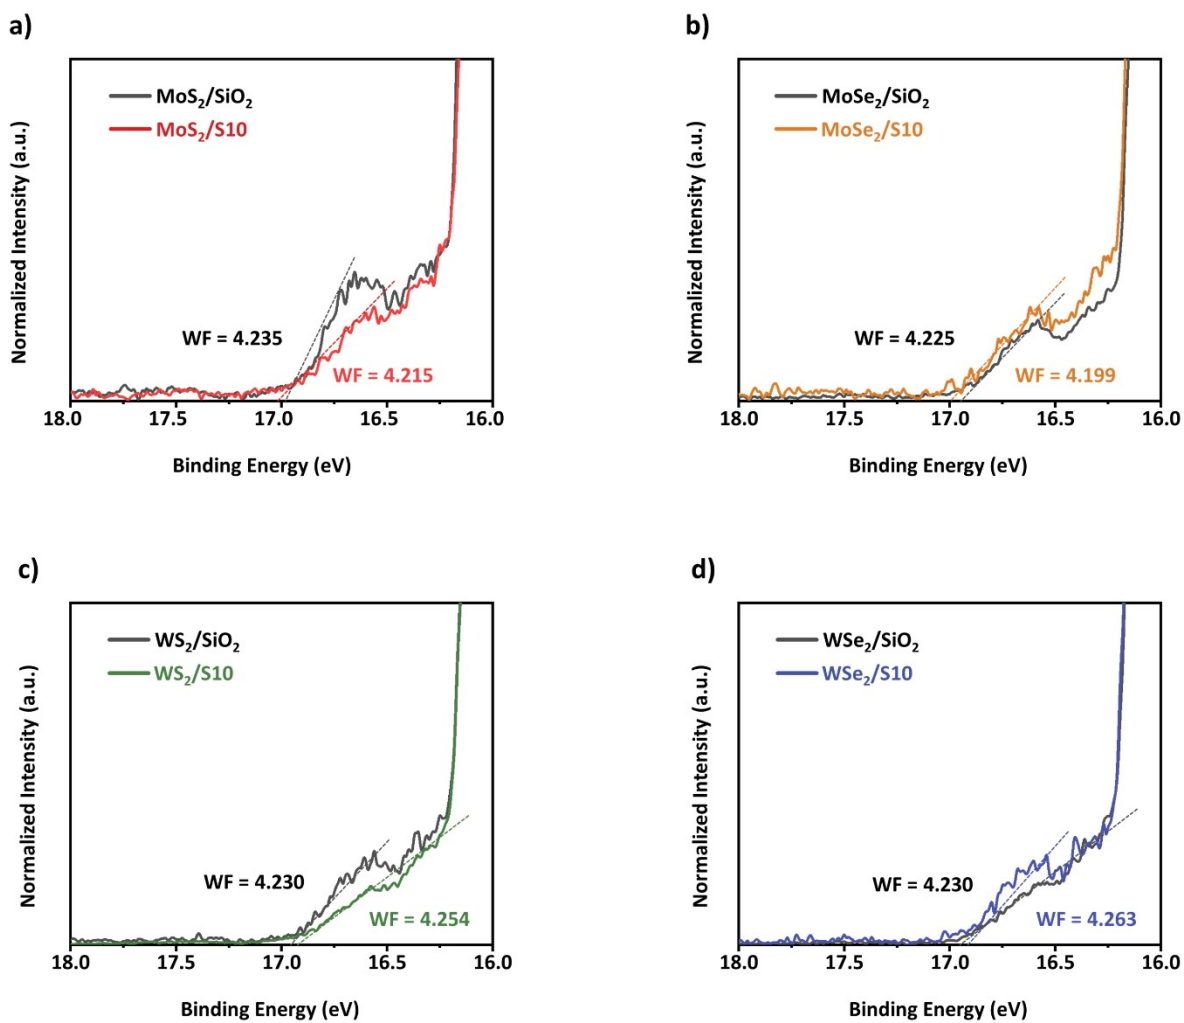

**Figure S3.** Ultraviolet photoelectron spectroscopy of TMDCs on SiO<sub>2</sub> and S10, respectively.

a) MoS<sub>2</sub>, b) MoSe<sub>2</sub>, c) WS<sub>2</sub>, and d) WSe<sub>2</sub>.

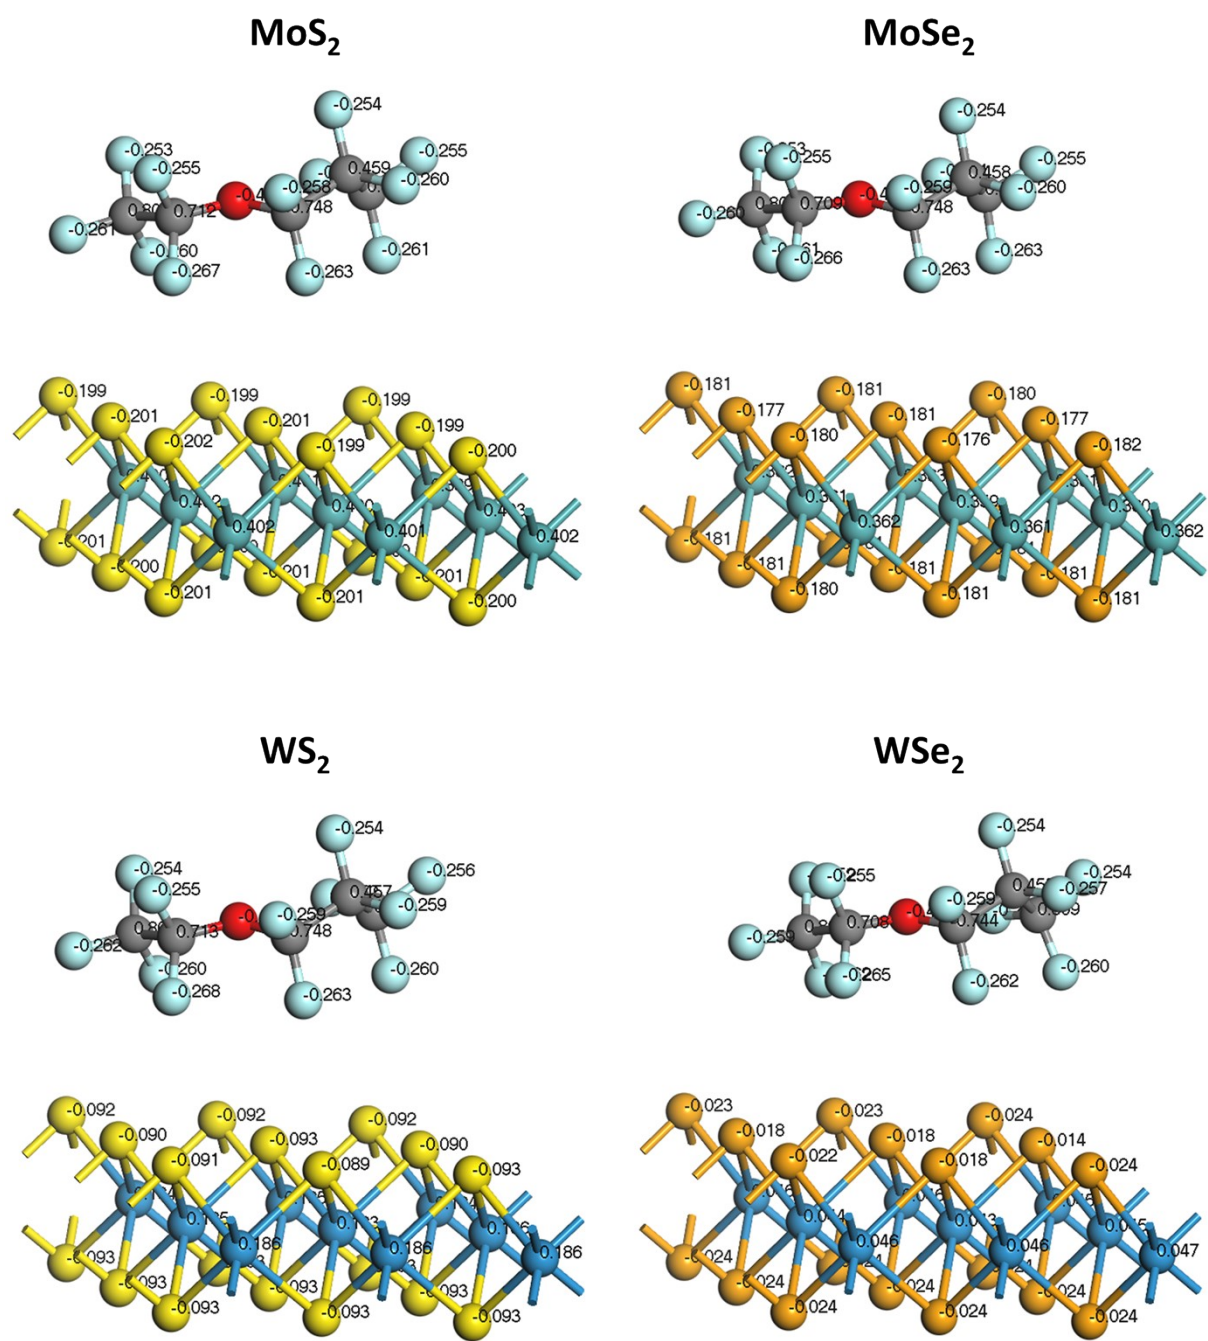

**Figure S4.** The atomic charge distribution of TMDCs/S10 heterostructure through Mulliken analysis.

**Table S3.** The changes of dipole moment depending on S10.

| <b>TMDCs</b>            | <b>Bond length (Å)</b> | <b>Intrinsic Dipole moment (Debye)</b> | <b>Induced Dipole moment with S10 (Debye)</b> |
|-------------------------|------------------------|----------------------------------------|-----------------------------------------------|
| <b>MoS<sub>2</sub></b>  | 2.42                   | 0.50                                   | 0.93                                          |
| <b>MoSe<sub>2</sub></b> | 2.49                   | 0.45                                   | 0.78                                          |
| <b>WS<sub>2</sub></b>   | 2.40                   | 0.14                                   | 0.19                                          |
| <b>WSe<sub>2</sub></b>  | 2.49                   | 0.11                                   | 0.01                                          |

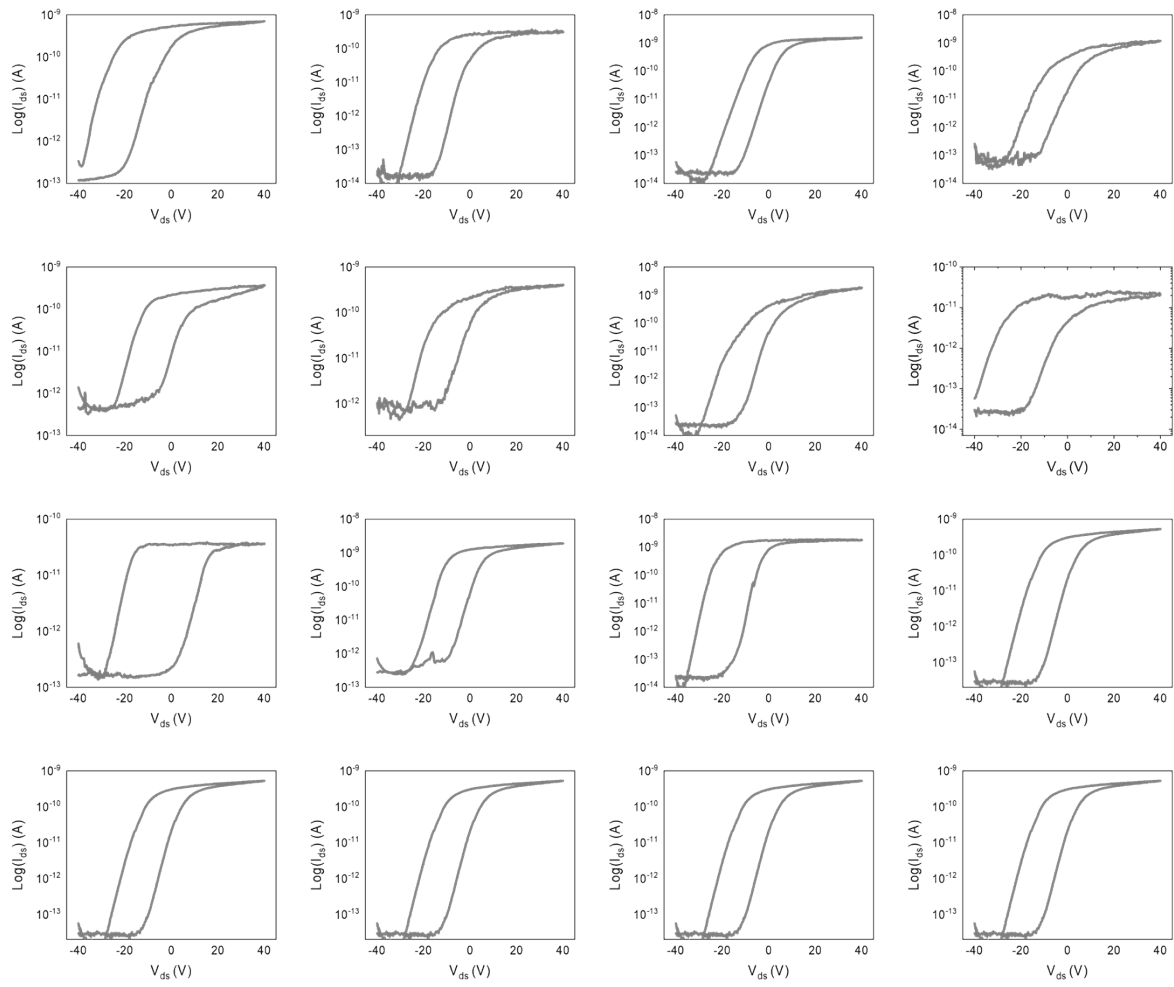

**Figure S5.** The electrical transport of pristine MoS<sub>2</sub> devices.



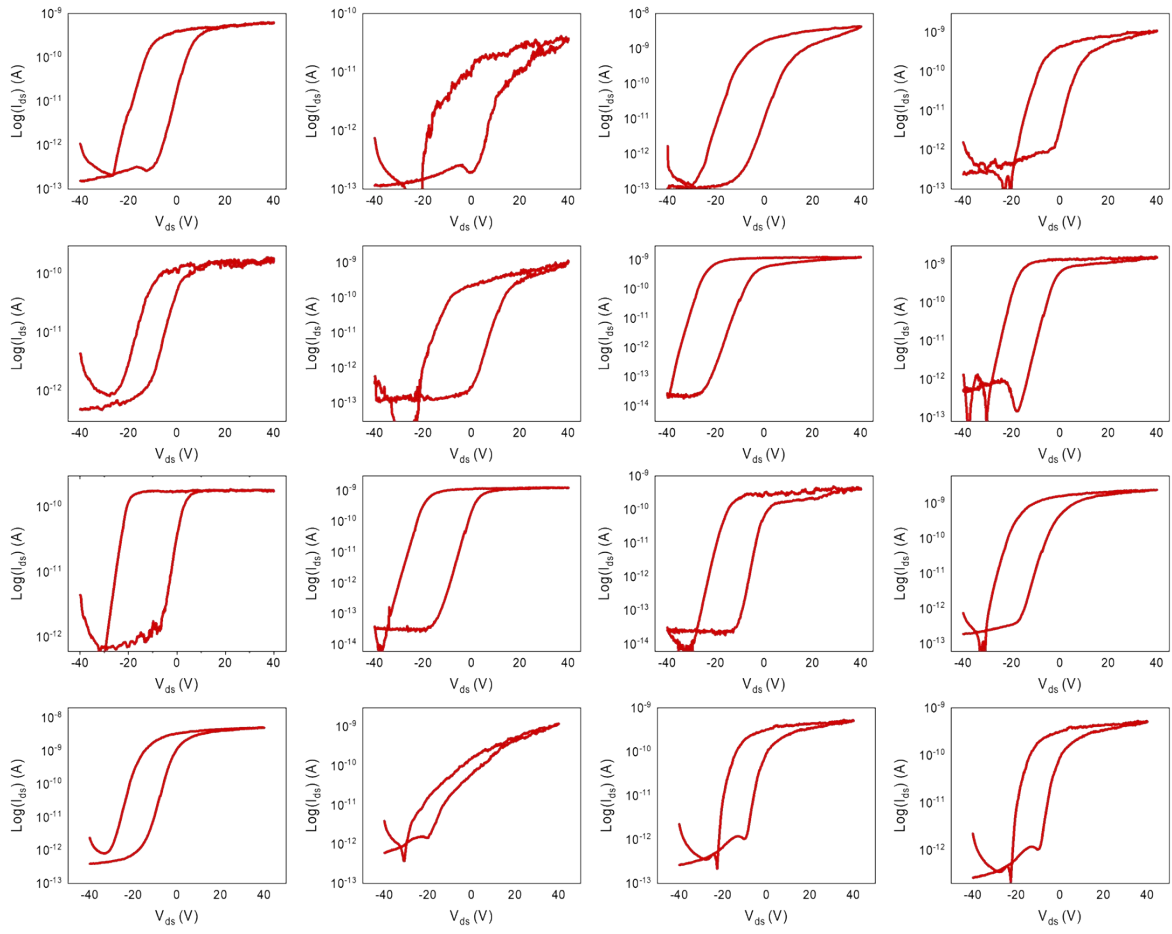

**Figure S6.** The electrical transport of pristine MoS<sub>2</sub>/S10 devices.

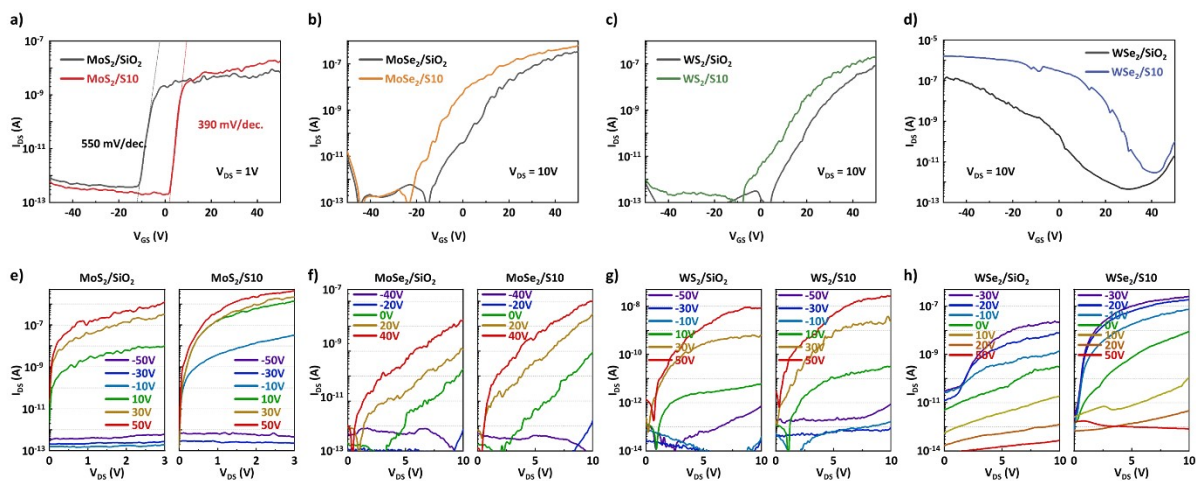

**Figure S7.** The comparison of electrical properties for the devices of TMDCs monolayer on S10 and SiO<sub>2</sub>, respectively. The transfer curves of a) MoS<sub>2</sub>, b) MoSe<sub>2</sub>, c) WS<sub>2</sub>, d) WSe<sub>2</sub> and the output curves of e) MoS<sub>2</sub>, f) MoSe<sub>2</sub>, g) WS<sub>2</sub>, h) WSe<sub>2</sub> are presented, respectively.

**Table S4.** The comparison of field effect mobility and subthreshold swing in TMDCs monolayer on SiO<sub>2</sub> and S10.

| TMDCs                                            | MoS <sub>2</sub> |       | MoSe <sub>2</sub> |       | WS <sub>2</sub>  |       | WSe <sub>2</sub> |       |
|--------------------------------------------------|------------------|-------|-------------------|-------|------------------|-------|------------------|-------|
|                                                  | SiO <sub>2</sub> | S10   | SiO <sub>2</sub>  | S10   | SiO <sub>2</sub> | S10   | SiO <sub>2</sub> | S10   |
| <b>Field effect mobility (cm<sup>2</sup>/Vs)</b> | 0.042            | 0.082 | 0.123             | 0.251 | 0.089            | 0.185 | 0.140            | 0.301 |
| <b>SS (mV/dec.)</b>                              | 550              | 390   | 2,790             | 1,720 | 6,100            | 3,190 | 3,690            | 1,560 |

## Supporting Note 1

To determine the electron populations of transition metal dichalcogenides (TMDCs) when perfluoropolyether (PFPE) approaches, we performed quantum mechanical calculations using DMOL3 code as implemented in the BIOVIA Materials Studio platform. The double numeric atomic orbitals with polarization for the basis sets, and all electrons, with a relativistic effect considered for the core parts, were used during calculation. The exchange-correlation functionals with generalized gradient approximation<sup>1</sup>, and the  $k$ -points samplings by Monkhorst-Pack grid with equidistance of  $0.02 \text{ \AA}^{-1}$  were chosen. The lattice constants of optimized bulk TMDCs using calculational parameters listed above follows:  $a = b = 3.19 \text{ \AA}$  and  $c = 14.88 \text{ \AA}$  for  $\text{MoS}_2$ ,  $a = b = 3.33 \text{ \AA}$  and  $c = 15.45 \text{ \AA}$  for  $\text{MoSe}_2$ ,  $a = b = 3.19 \text{ \AA}$  and  $c = 14.20 \text{ \AA}$  for  $\text{WS}_2$ , and  $a = b = 3.30 \text{ \AA}$  and  $c = 15.07 \text{ \AA}$  for  $\text{WSe}_2$ . The optimized structures are well matched with previous results:  $a = b = 3.15 \text{ \AA}$  and  $c = 12.3 \text{ \AA}$  for  $\text{MoS}_2$ ,  $a = b = 3.3 \text{ \AA}$  and  $c = 13.0 \text{ \AA}$  for  $\text{MoSe}_2$ ,  $a = b = 3.15 \text{ \AA}$  and  $c = 12.32 \text{ \AA}$  for  $\text{WS}_2$ , and  $a = b = 3.29 \text{ \AA}$ , and  $c = 12.98 \text{ \AA}$  for  $\text{WSe}_2$ .

From the optimized geometry, we generated  $(3 \times 3)$  supercell and cleaved the  $(0\ 0\ 1)$  surface to consider the population differences of surface. After that, we applied  $60 \text{ \AA}$  of vacuum slab to exclude interlayer interaction. The monomer of PFPE was used to accelerate the simulation. To consider the actual experimental conditions, we first modeled PFPE on the TMDCs surface with a  $1 \text{ \AA}$  distance. As a result of geometry optimization, the distance between PFPE and TMDCs surface became  $3 \text{ \AA}$  naturally due to Coulomb interaction matching to AFM measurement. After that, the contributions to the atomic charge from each atomic orbital on each atom were calculated using Mulliken-analysis method.

## Supporting Note 2

The calculation for the changes of dipole moment on S10 was conducted using the equation shown below:

$$\mu = q \cdot r$$

$\mu$ ,  $q$ ,  $r$  are dipole moment, separated charge, and bond length of transition metal and chalcogen, respectively. The separated charge of TMDs by S10 was calculated by the equation,  $q = ed_c$ , ( $e$ : a charge of electron,  $d_c$ : atomic charge distribution in figure S3).

### Supporting Note 3

The field-effect mobility ( $\mu_{FE}$ ) for each TMDC were calculated using the following equations:

$$\mu_{FE} = \frac{g_m L}{WC_{ox} V_{DS}}$$

where,  $g_m$  is the maximum back-gated transconductance. L and W are the length (8  $\mu\text{m}$ ) and width (25  $\mu\text{m}$ ) of the channel, respectively.  $C_{OX}$  ( $=\epsilon_0 \cdot \epsilon_r / d$ ;  $\epsilon_r=3.9$ ) represents the back-gate capacitance of SiO<sub>2</sub> (300 nm).  $V_{DS}$  is the drain-source voltage.

The subthreshold swing (SS) of devices were calculated using the equation shown below:

$$SS = \left( \frac{d(\log_{10} I_{DS})}{dV_{GS}} \right)^{-1}$$

## References

- (1) J. P. Perdew, J.P.; Burke, K.; Ernzerhof, M., Generalized Gradient Approximation Made Simple: *Phys. Rev. Lett.* **1996**, *77*, 3865.
- (2) Voß, D.; Krüger, P.; Mazur, A.; Pollmann, J. Atomic and Electronic Structure of from Ab Initio Theory: Bulk Crystal and Thin Film Systems. *Phys. Rev. B: Condens. Matter Mater. Phys.* **1999**, *60* (20), 14311.
- (3) Roy, A.; Movva, H. C. P.; Satpati, B.; Kim, K. Structural and Electrical Properties of MoTe<sub>2</sub> and MoSe<sub>2</sub> Grown by Molecular Beam Epitaxy. *ACS Appl. Mater. Interfaces* **2016**, *8* (11), 7396–7402.
- (4) Molina-Sánchez, A.; Wirtz, L. Phonons in Single-Layer and Few-Layer MoS<sub>2</sub> and WS<sub>2</sub>. *Phys. Rev. B Condens. Matter Mater. Phys.* **2011**, *84* (15), 155413.
